# Supplementary material
Source: publisher figshare collection journal article supplement (https://wiley.figshare.com/articles/dataset/_/3520565)
Supplement: Supplementary file 1 [file 1]

Sean C. Anderson, Jonathan W. Moore, Michelle M. McClure, Nicholas K. Dulvy, Andrew B. Cooper. 2014. Portfolio conservation of metapopulations under climate change. *Ecological Applications* 25:559–572.

APPENDIX D. Example simulated time series from alternative conservation scenarios.

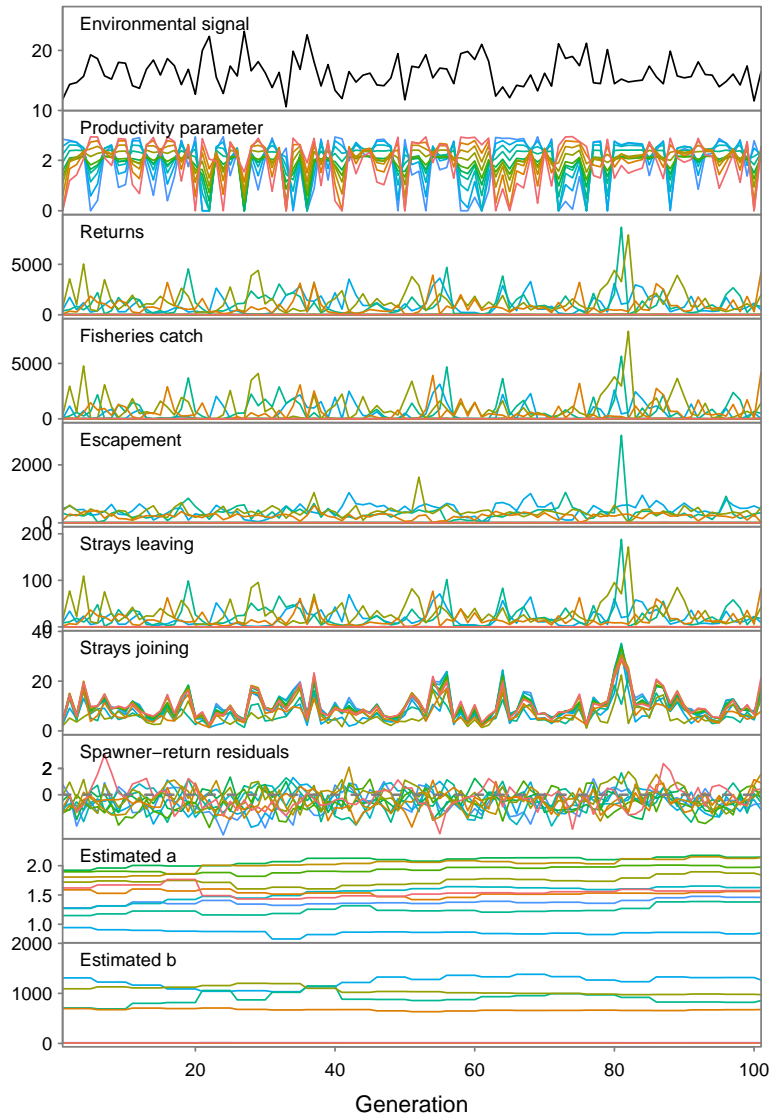

FIG. D1. Conserving a **full range** of response diversity (spatial conservation strategy) with **short-term** environmental fluctuations. This is the same as Fig. 3 but in colour.

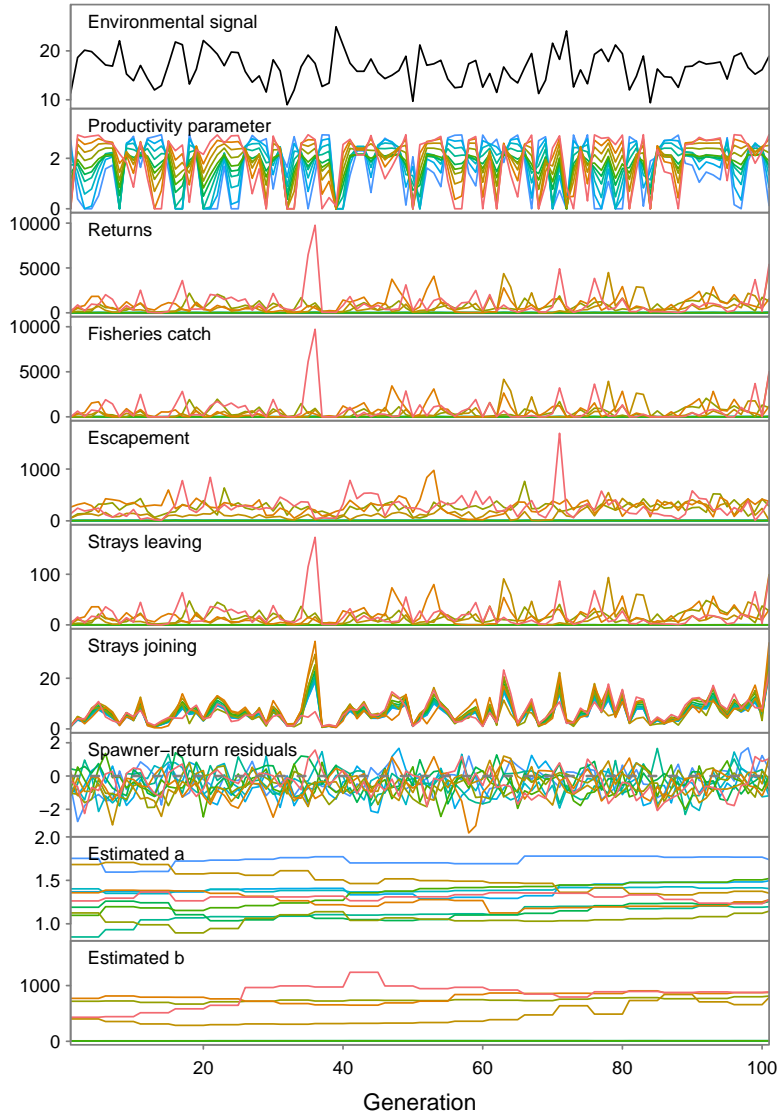

FIG. D2. Conserving **one half** of response diversity (spatial conservation strategy) with **short-term** environmental fluctuations.

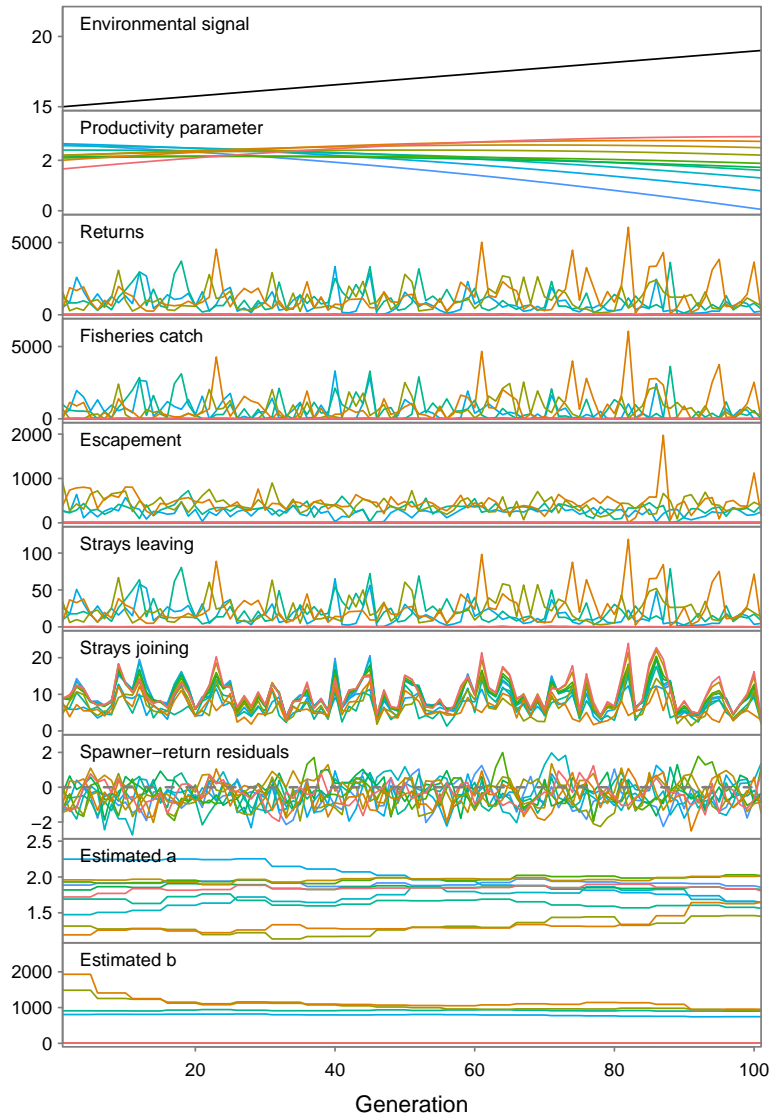

FIG. D3. Conserving a **full range** of response diversity (spatial conservation strategy) with **long-term** environmental change.

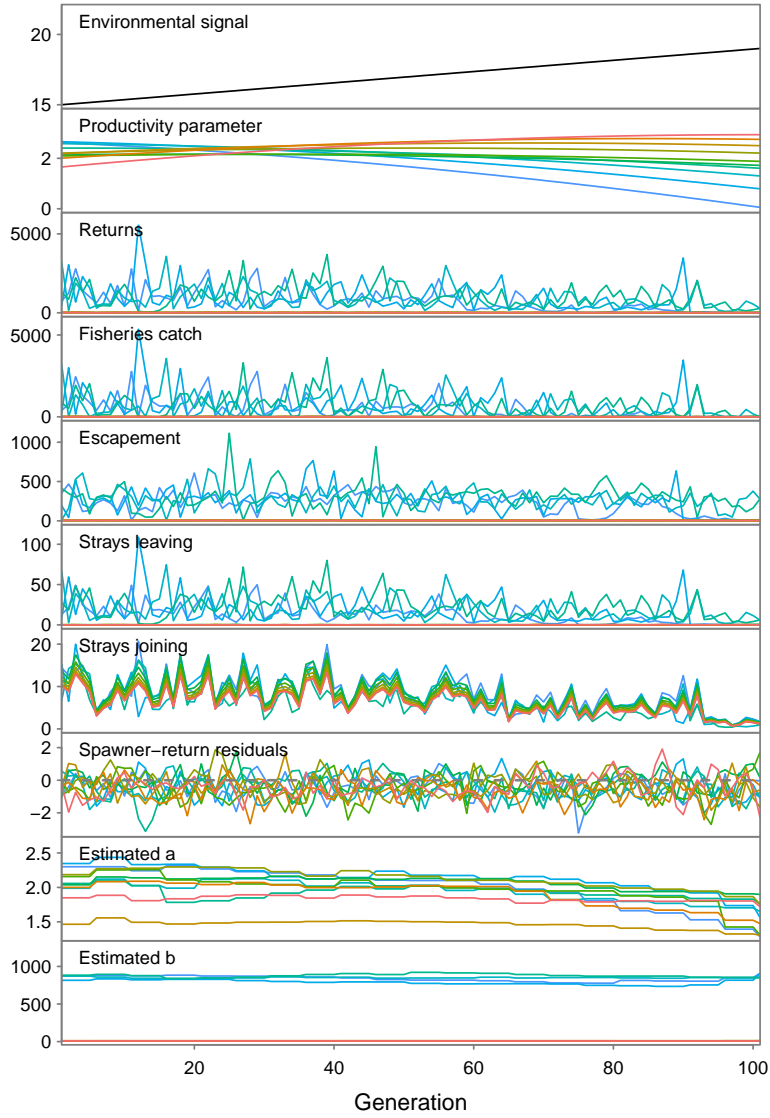

FIG. D4. Conserving **one half** of response diversity (spatial conservation strategy) with **long-term** environmental change.

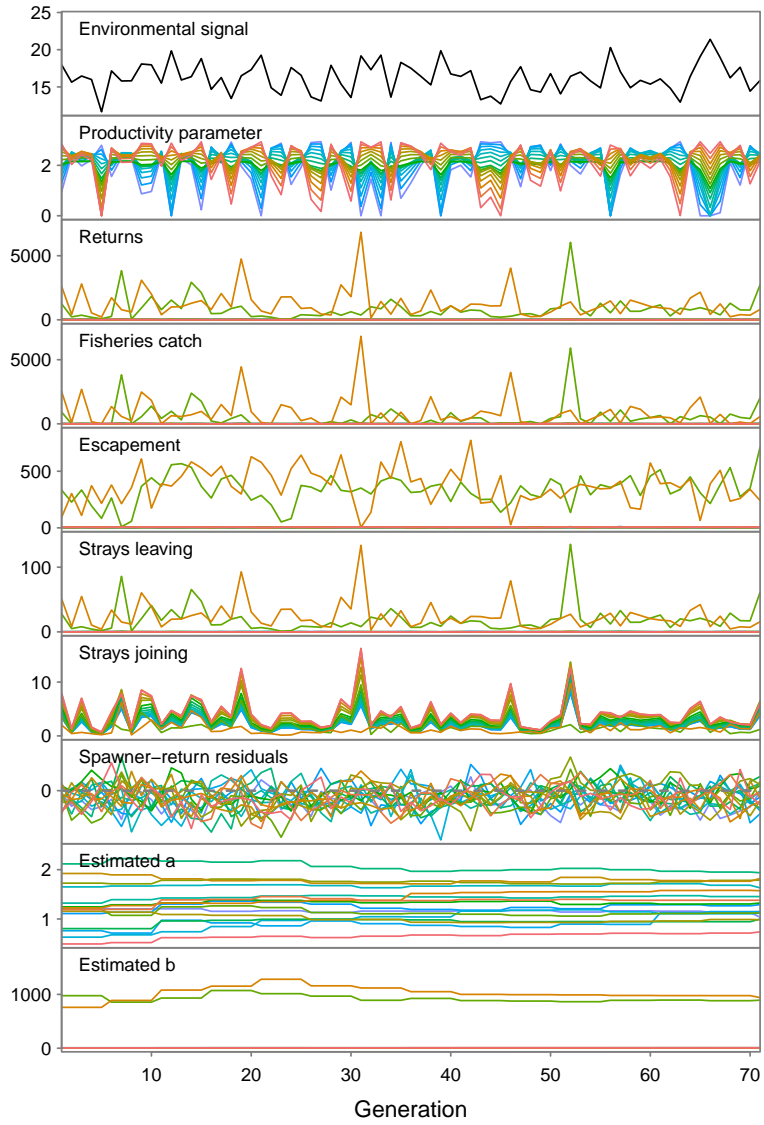

FIG. D5. **Two populations** conserved with random response diversity and **short-term** environmental fluctuations.

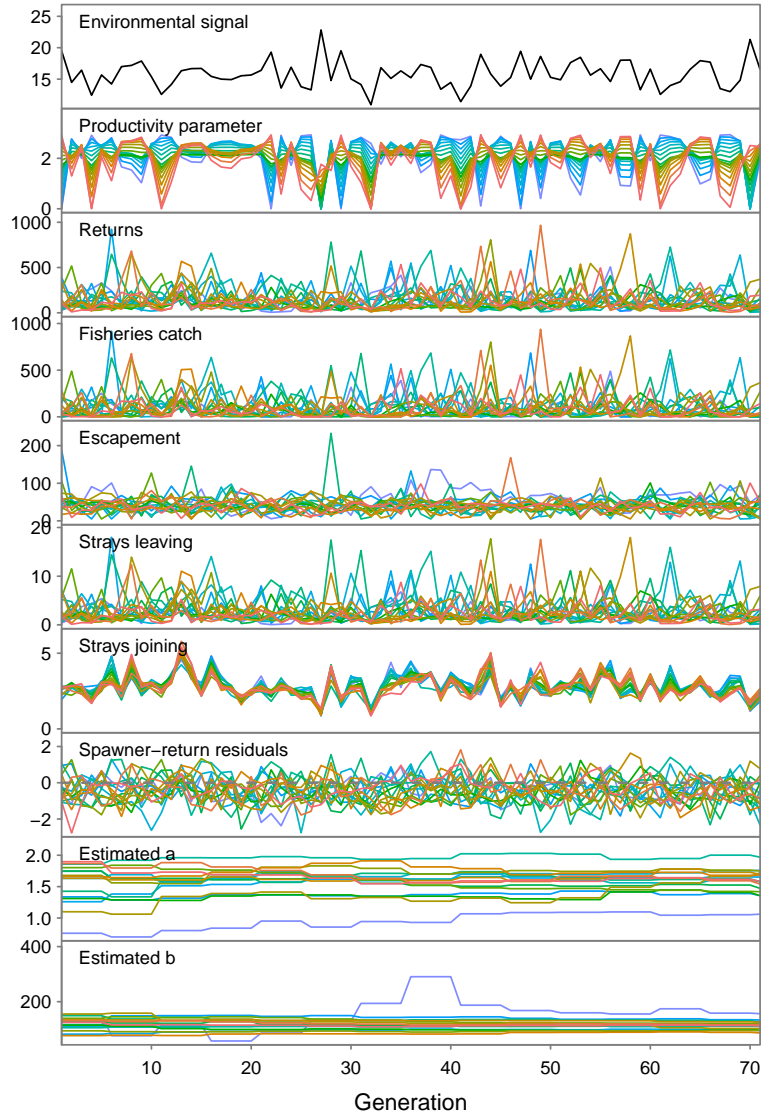

FIG. D6. **Sixteen populations** conserved with random response diversity and **short-term** environmental fluctuations.

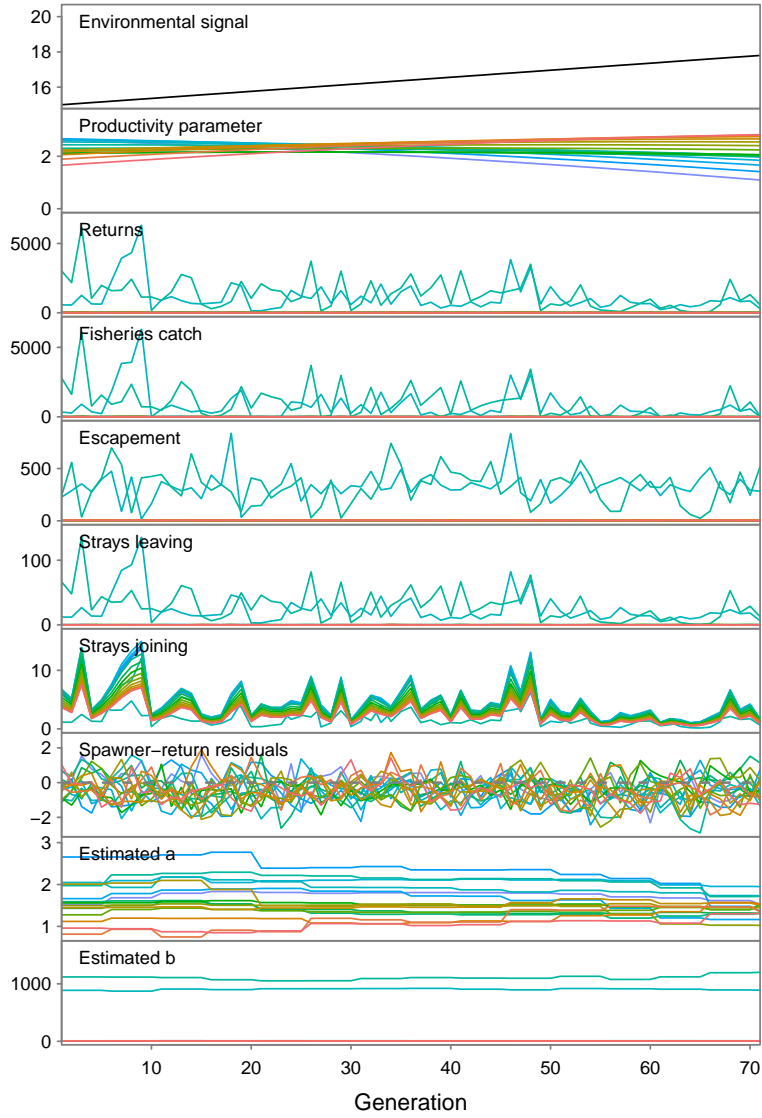

FIG. D7. **Two populations** conserved with random response diversity and long-term environmental change.



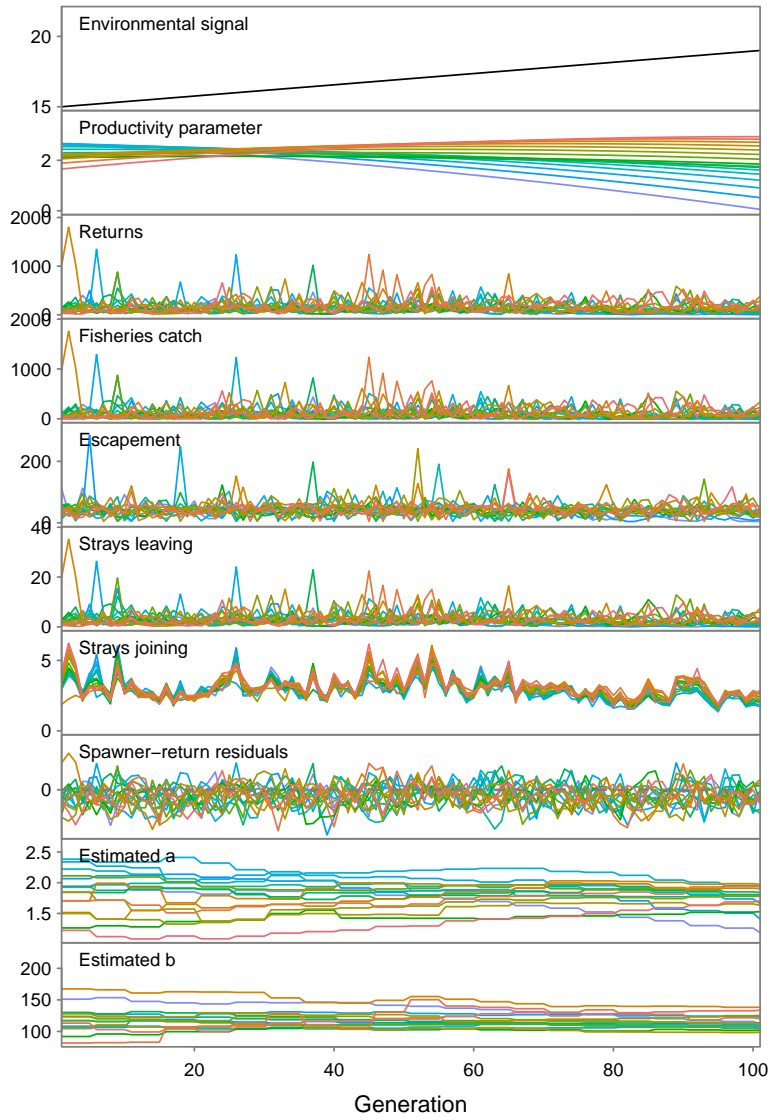

FIG. D8. **Sixteen populations** conserved with random response diversity and **long-term** environmental change.

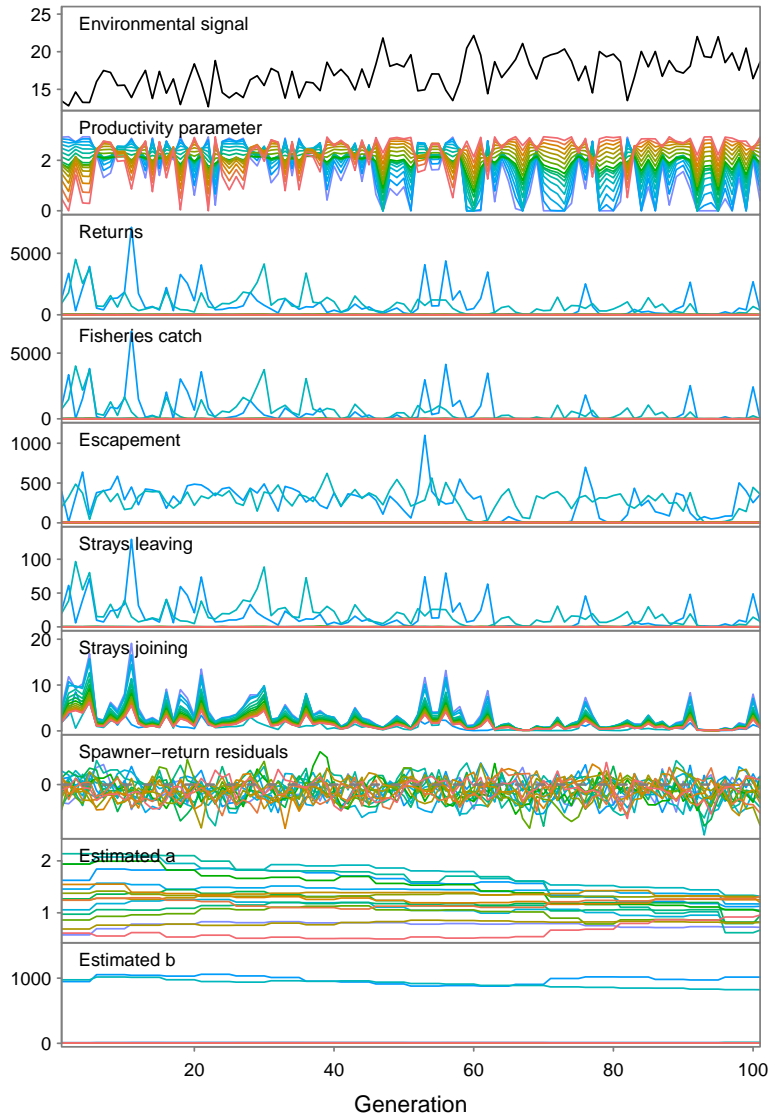

FIG. D9. **Two populations** conserved with random response diversity and long-term declining stream flow.

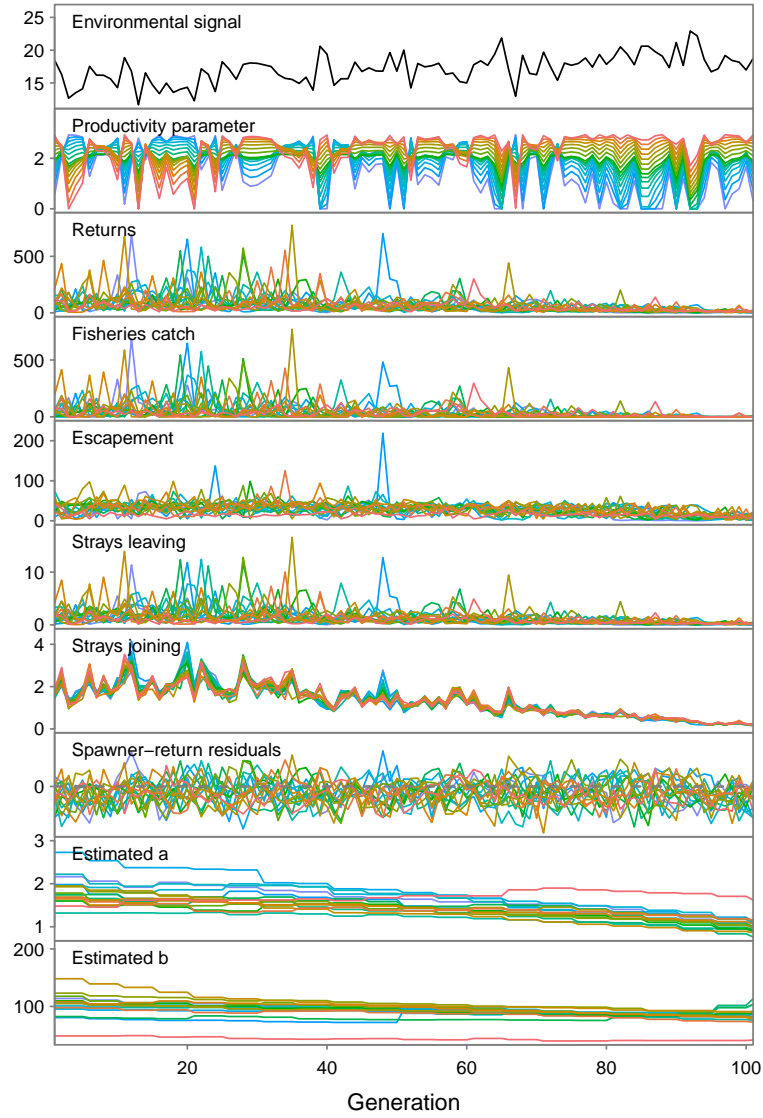

FIG. D10. **Sixteen populations** conserved with random response diversity and **long-term declining stream flow**.
